# Supplementary material
Source: PubMed Central journal article supplement (PMC8454706)
Supplement: NIHMS1632078-supplement-1.pdf [file NIHMS1632078-supplement-1.pdf]

**Table E1.** IDT results by FQ and concentration used for criteria #1, criteria #2, criteria #3, and criteria #4 and if underwent oral challenge to IDT positive FQ in 163 patients<sup>a</sup>

| FQ                         | Concentration              | Criteria #1 <sup>b</sup>                                                                                       | Criteria #2 <sup>c</sup>                                                                                               | Criteria #3 <sup>d</sup>                                                                                    | Criteria #4 <sup>e</sup>                                                                                                                                                                                                                                                   |
|----------------------------|----------------------------|----------------------------------------------------------------------------------------------------------------|------------------------------------------------------------------------------------------------------------------------|-------------------------------------------------------------------------------------------------------------|----------------------------------------------------------------------------------------------------------------------------------------------------------------------------------------------------------------------------------------------------------------------------|
|                            |                            | <ul style="list-style-type: none"> <li>FQ wheal <math>\geq</math> saline wheal + 3 mm</li> </ul>               | <ul style="list-style-type: none"> <li>FQ wheal <math>\geq</math> saline wheal + 3mm</li> <li>Flare present</li> </ul> | <ul style="list-style-type: none"> <li>FQ wheal <math>\geq</math> 5 mm</li> <li>Flare &gt; wheal</li> </ul> | <ul style="list-style-type: none"> <li>Specific FQ flare at 0.025 mg/mL <math>\geq</math> histamine flare</li> <li>Specific FQ flare <math>\geq</math> 5 mm at 0.005 mg/mL</li> <li>No flare <math>\geq</math> 5 mm for either of the other 2 FQ at 0.005 mg/mL</li> </ul> |
| Ciprofloxacin IDT Positive |                            | Number oral challenged to ciprofloxacin with positive ciprofloxacin IDT / total ciprofloxacin IDT positive (%) |                                                                                                                        |                                                                                                             |                                                                                                                                                                                                                                                                            |
|                            | 0.005 mg/mL                | 14/49<br>(29%)                                                                                                 | 1/7<br>(14%)                                                                                                           | 1/4<br>(25%)                                                                                                | 0/1<br>(0%)                                                                                                                                                                                                                                                                |
|                            | 0.025 mg/mL                | 21/68<br>(31%)                                                                                                 | 11/37<br>(30%)                                                                                                         | 6/20<br>(30%)                                                                                               |                                                                                                                                                                                                                                                                            |
|                            | 0.005 mg/mL or 0.025 mg/mL | 22/75<br>(29%)                                                                                                 | 11/38<br>(29%)                                                                                                         | 6/20<br>(30%)                                                                                               |                                                                                                                                                                                                                                                                            |
| Levofloxacin IDT Positive  |                            | Number oral challenged to levofloxacin with positive levofloxacin IDT / total levofloxacin IDT positive (%)    |                                                                                                                        |                                                                                                             |                                                                                                                                                                                                                                                                            |
|                            | 0.005 mg/mL                | 5/56<br>(9%)                                                                                                   | 1/10<br>(10%)                                                                                                          | 2/7<br>(29%)                                                                                                | 0/1<br>(0%)                                                                                                                                                                                                                                                                |
|                            | 0.025 mg/mL                | 7/58<br>(12%)                                                                                                  | 1/10<br>(10%)                                                                                                          | 1/8<br>(13%)                                                                                                |                                                                                                                                                                                                                                                                            |
|                            | 0.005 mg/mL or 0.025 mg/mL | 8/66<br>(12%)                                                                                                  | 2/13<br>(15%)                                                                                                          | 2/11<br>(18%)                                                                                               |                                                                                                                                                                                                                                                                            |
| Moxifloxacin IDT Positive  |                            | Number oral challenged to moxifloxacin with positive moxifloxacin IDT / total moxifloxacin IDT positive (%)    |                                                                                                                        |                                                                                                             |                                                                                                                                                                                                                                                                            |
|                            | 0.005 mg/mL                | 1/48<br>(2%)                                                                                                   | 0/9<br>(0%)                                                                                                            | 0/8<br>(0%)                                                                                                 | 0/2<br>(0%)                                                                                                                                                                                                                                                                |
|                            | 0.025 mg/mL                | 1/66<br>(2%)                                                                                                   | 1/32<br>(3%)                                                                                                           | 0/22<br>(0%)                                                                                                |                                                                                                                                                                                                                                                                            |
|                            | 0.005 mg/mL or 0.025 mg/mL | 1/72<br>(2%)                                                                                                   | 1/35<br>(3%)                                                                                                           | 0/26<br>(0%)                                                                                                |                                                                                                                                                                                                                                                                            |
| At least 1 FQ IDT Positive |                            | Number oral challenged to at least 1 FQ with at least 1 FQ IDT positive / total positive to at least 1 FQ (%)  |                                                                                                                        |                                                                                                             |                                                                                                                                                                                                                                                                            |
|                            | 0.005 mg/mL                | 34/73<br>(47%)                                                                                                 | 9/19<br>(47%)                                                                                                          | 11/13<br>(85%)                                                                                              | 2/4<br>(50%)                                                                                                                                                                                                                                                               |
|                            | 0.0025 mg/mL               | 43/83<br>(52%)                                                                                                 | 25/48<br>(52%)                                                                                                         | 28/33<br>(85%)                                                                                              |                                                                                                                                                                                                                                                                            |
|                            | 0.005 mg/mL or 0.025 mg/mL | 48/96<br>(50%)                                                                                                 | 28/53<br>(53%)                                                                                                         | 33/36<br>(92%)                                                                                              |                                                                                                                                                                                                                                                                            |

Abbreviations: FQ = fluoroquinolone; IDT = intradermal test

<sup>a</sup>82 of 159 patients with negative IDT by criteria #4 underwent oral challenge to a total 85 FQ doses (15 patients labeled to  $\geq$  2 FQ). 2 of 4 patients with positive IDT by criteria #4 for a specific FQ underwent oral challenge to an IDT negative FQ. No immediate or delayed reactions were observed in patients that underwent IDT and FQ oral challenge.

<sup>b</sup>Based on the "Drug allergy: an updated practice parameter" (*Ann Allergy Asthma Immunol.* 2010)

<sup>c</sup>Based on the the European Network on Drug Allergy (ENDA) criteria (Brockow K et al. *Allergy.* 2013)

<sup>d</sup>Based on currently used interpretation for a positive skin test in penicillin allergy (Shenoy ES et al. *JAMA.* 2019)

<sup>e</sup>Study proposed criteria developed during routine clinical care and applied retrospectively based on observation that non-specific wheal without flare frequently occurs in patients with suspected non-IgE mediated mast cell activation

**Table E2.** Index FQ and reaction, oral challenge FQ, and subsequent treatment FQ for the 82 patients with negative intradermal testing by proposed criteria #4 who underwent oral challenge

| Index Fluoroquinolone (FQ)                                          | Index Reaction              | Oral Challenge FQ |         |         | Subsequent Treatment |              |         | Oral Challenge FQ |   |              | Subsequent Treatment |   |   |
|---------------------------------------------------------------------|-----------------------------|-------------------|---------|---------|----------------------|--------------|---------|-------------------|---|--------------|----------------------|---|---|
|                                                                     |                             | Ciprofloxacin     | C       | L       | M                    | Levofloxacin | C       | L                 | M | Moxifloxacin | C                    | L | M |
| <b>Ciprofloxacin (C)</b><br>91 Labels<br>• 50 OC<br>• 14 Treatments | Immediate <sup>d</sup>      | 6<br>•0           | 0       | 0       | 0                    | 4<br>•1      | 0       | 0                 | 0 | 0            | 0                    | 0 | 0 |
|                                                                     | Immediate-type <sup>e</sup> | 30<br>•6          | 5<br>•2 | 5<br>•0 | 0                    | 4<br>•1      | 0       | 2<br>•0           | 0 | 0            | 0                    | 0 | 0 |
|                                                                     | Delayed                     | 2                 | 0       | 1       | 0                    | 3            | 0       | 1                 | 0 | 0            | 0                    | 0 | 0 |
|                                                                     | Unknown                     | 1                 | 0       | 0       | 0                    | 0            | 0       | 0                 | 0 | 0            | 0                    | 0 | 0 |
| <b>Levofloxacin (L)</b><br>89 Labels<br>• 40 OC<br>• 13 Treatments  | Immediate                   | 6<br>•2           | 0       | 0       | 0                    | 7<br>•1      | 2<br>•0 | 2<br>•0           | 0 | 0            | 0                    | 0 | 0 |
|                                                                     | Immediate-type              | 8<br>•3           | 3<br>•2 | 1<br>•0 | 0                    | 12<br>•2     | 1<br>•0 | 3<br>•0           | 0 | 0            | 0                    | 0 | 0 |
|                                                                     | Delayed                     | 2                 | 0       | 0       | 0                    | 5            | 1       | 1                 | 0 | 0            | 0                    | 0 | 0 |
|                                                                     | Unknown                     | 0                 | 0       | 0       | 0                    | 0            | 0       | 0                 | 0 | 0            | 0                    | 0 | 0 |
| <b>Moxifloxacin (M)</b><br>19 Labels<br>• 10 OC<br>• 1 Treatment    | Immediate                   | 3<br>•2           | 1<br>•0 | 0       | 0                    | 1<br>•1      | 0       | 0                 | 0 | 0            | 0                    | 0 | 0 |
|                                                                     | Immediate-type              | 2<br>•1           | 0       | 0       | 0                    | 0            | 0       | 0                 | 0 | 2<br>•0      | 0                    | 0 | 0 |
|                                                                     | Delayed                     | 0                 | 0       | 0       | 0                    | 2            | 0       | 0                 | 0 | 0            | 0                    | 0 | 0 |
|                                                                     | Unknown                     | 0                 | 0       | 0       | 0                    | 0            | 0       | 0                 | 0 | 0            | 0                    | 0 | 0 |

Abbreviations: C = ciprofloxacin FQ = fluoroquinolone; L = levofloxacin; M = moxifloxacin; OC = oral challenge

<sup>a</sup>Of the 163 patients, 39 patients carried labels for  $\geq 2$  FQ, bringing total labels to 199.

<sup>b</sup>Of the 82 patients who underwent oral challenge, 15 patients carried labels for  $\geq 2$  FQ. In total, there were 85 oral challenge doses administered and, in this table, patients with multiple FQ labels are counted for each of their index fluoroquinolone labels, bringing the total OC represented in this table to 100.

<sup>c</sup>Of the 23 patients that underwent subsequent treatment, 6 patients carried labels for  $\geq 2$  FQ, and in this table, patients with multiple FQ labels are counted for each of their index FQ labels, bringing the total subsequent treatments represented in this table to 28.

<sup>d</sup>Symptoms occurring within 1 hour of first dose

<sup>e</sup>Symptoms occurring within 1 to 36 hours of first dose
